# Supplementary material for: Taking a Promising Vaccine Candidate Further: Efficacy of ASFV-G-ΔMGF after Intramuscular Vaccination of Domestic Pigs and Oral Vaccination of Wild Boar
Source: Preprints.org preprint supplement (doi:10.20944/preprints202208.0051.v1), 2022-08-02
Supplement: Supplementary file 1 [file supplementary]

## Sheet: Suppl. Table 1 
Supplementary table 1: back titration of viruses used for inoculations
Trial	Type	Titer in HAD50/ml
DP A	prime vac	2.7x104
	boost vac	5.4x104
	challenge	1.7x104
DP B	prime vac	4.4x103
	boost vac	5.6x103
	challenge	1.3x105
WB	prime vac	2.4x105
	challenge	3.5x104

## Sheet: Suppl. Table 2
Supplementary table 2: Blocking percentages from sera
% blocking OF, INGEZIM PPA COMPAC (Ingenasa)
trial	group	animal #	d0	d7	d14	d21	d28	d35	d42 / d0pc	d4pc	d7pc	d10pc	d14pc	d21pc	d28pc
dom. pig A		16	11	22	35	22	64	85	94	95	96	98	103	102	104
		17	20	27	61	66	71	89	98	100	100	100	101	103	105
	MGF i.m. B	18	12	32	72	60	82	90	95	98	99	100	102	104	104
		19	11	21	28	42	69	84	78	82	83	85	90	92	96
		20	15	15	28	52	82	89	97	98	102	105	104	105	87
		6							13	13	16	✝
		7							14	12	✝
	control A	8							12	18	✝
		9							17	15	✝
		10							19	14	12	✝
dom. pig B		21	13	14	72	100	98	104	106	109	109	111	108	102	102
		22	12	10	71	65	71	83	92	91	99	102	101	101	103
	MGF i.m. B	23	16	10	79	76	76	83	99	101	105	108	108	103	104
		24	19	16	45	50	68	89	96	100	104	105	104	103	103
		25	14	20	79	75	77	89	105	111	111	113	114	105	105
	control B	42							11	9	18	15	✝
		43							11	13	17	✝
		44							15	14	10	✝
		45							13	16	19	✝
% blocking OF, IDScreen ASF Indirect (IDVet)
trial	group	animal #	d0	d21	d28/d0pc	d7 pc	d8 pc	d9 pc	d28pc
wild boar	MGF oral	61	2.80992	69.4814					75.9046
		62	1.70799	3.39096			7.21745	✝
		63	1.70799	81.5824					61.392
		64	0.606061	2.59309					63.7331
		65	3.69146	81.7154					83.7049
		66	1.26722	77.992					85.2785
		67	1.70799	2.06117				17.3588	✝
		68	0.716253	1.13032					97.7512
	control WB	69			1.37741	13.5704	✝
		70			5.34435	13.2109	✝
		71			1.4876	8.43169	✝
		72			1.26722	7.45058	✝
green: negative, yellow: doubtful, red: positive
pc : post challenge

## Sheet: Suppl. Table 3
Supplementary table 3: genome copies detected in swabs by qPCR
trial	group	animal #	d7	d14	d21	d28	d35	d42 / d0pc	d4pc	d7pc	d10pc	d14pc	d21pc
dom. pig A		16	n.d.	n.d.	n.d.	n.d.	n.d.	n.d.	n.d.	n.d.	n.d.	n.d.	n.d.
		17	n.d.	n.d.	n.d.	n.d.	n.d.	n.d.	n.d.	n.d.	n.d.	n.d.	n.d.
	MGF i.m. B	18	n.d.	n.d.	n.d.	n.d.	n.d.	n.d.	n.d.	n.d.	n.d.	n.d.	n.d.
		19	n.d.	n.d.	n.d.	n.d.	n.d.	n.d.	n.d.	n.d.	n.d.	n.d.	n.d.
		20	n.d.	n.d.	n.d.	n.d.	n.d.	n.d.	n.d.	n.d.	n.d.	n.d.	n.d.
		6	n.d.	n.d.	n.d.	n.d.	n.d.	n.d.	n.d.	n.d.	✝
		7	n.d.	n.d.	n.d.	n.d.	n.d.	n.d.	n.d.	✝
	control A	8	n.d.	n.d.	n.d.	n.d.	n.d.	n.d.	n.d.	✝
		9	n.d.	n.d.	n.d.	n.d.	n.d.	n.d.	4.685	✝
		10	n.d.	n.d.	n.d.	n.d.	n.d.	n.d.	n.d.	4.621	✝
dom. pig B		21	n.d.	n.d.	n.d.	n.d.	n.d.	n.d.	n.d.	n.d.	n.d.	n.d.	n.d.
		22	n.d.	n.d.	n.d.	n.d.	n.d.	n.d.	n.d.	n.d.	n.d.	n.d.	n.d.
	MGF i.m. B	23	n.d.	n.d.	n.d.	n.d.	n.d.	n.d.	n.d.	n.d.	n.d.	n.d.	n.d.
		24	n.d.	n.d.	n.d.	n.d.	n.d.	n.d.	n.d.	n.d.	n.d.	n.d.	n.d.
		25	n.d.	n.d.	n.d.	n.d.	n.d.	n.d.	n.d.	n.d.	n.d.	n.d.	n.d.
	control B	42						n.d.	n.d.	7.107	6.836	✝
		43						n.d.	n.d.	2.246	✝
		44						n.d.	n.d.	11.01	✝
		45						n.d.	n.d.	256.4	✝
n.d. : not detected
pc : post challenge
